# Supplementary material for: Understanding the interaction of nucleotides with UVC light: an insight from quantum chemical calculation-based findings
Source: Royal Society of Chemistry journal article supplement (doi:10.1039/d2cp05054d), 2023-01-01
Supplement: d2cp05054d1.pdf [file d2cp05054d1.pdf]

## Supplementary information

### Understanding the interaction of SARS-CoV-2 with UVC light:

#### An insight from quantum chemical calculation-based findings

Chunjian Tan<sup>1,2</sup>, Shaogang Wang<sup>1,2</sup>, Huiru Yang<sup>2</sup>, Qianming Huang<sup>2</sup>, Shizhen Li<sup>2</sup>, Xu Liu<sup>1,2</sup>, Huaiyu Ye<sup>2,\*</sup>,  
Guoqi Zhang<sup>1,\*</sup>

<sup>1</sup> Electronic Components, Technology and Materials, Delft University of Technology, 2628 CD Delft, The Netherlands.

<sup>2</sup> Engineering Research Center of Integrated Circuits for Next-Generation Communications, Ministry of Education, School of Microelectronics, Southern University of Science and Technology, Shenzhen 518055, P. R. China.

\* Correspondence: [yehy@sustech.edu.cn](mailto:yehy@sustech.edu.cn) and [G.Q. Zhang@tudelft.nl](mailto:G.Q. Zhang@tudelft.nl)

## Adenine

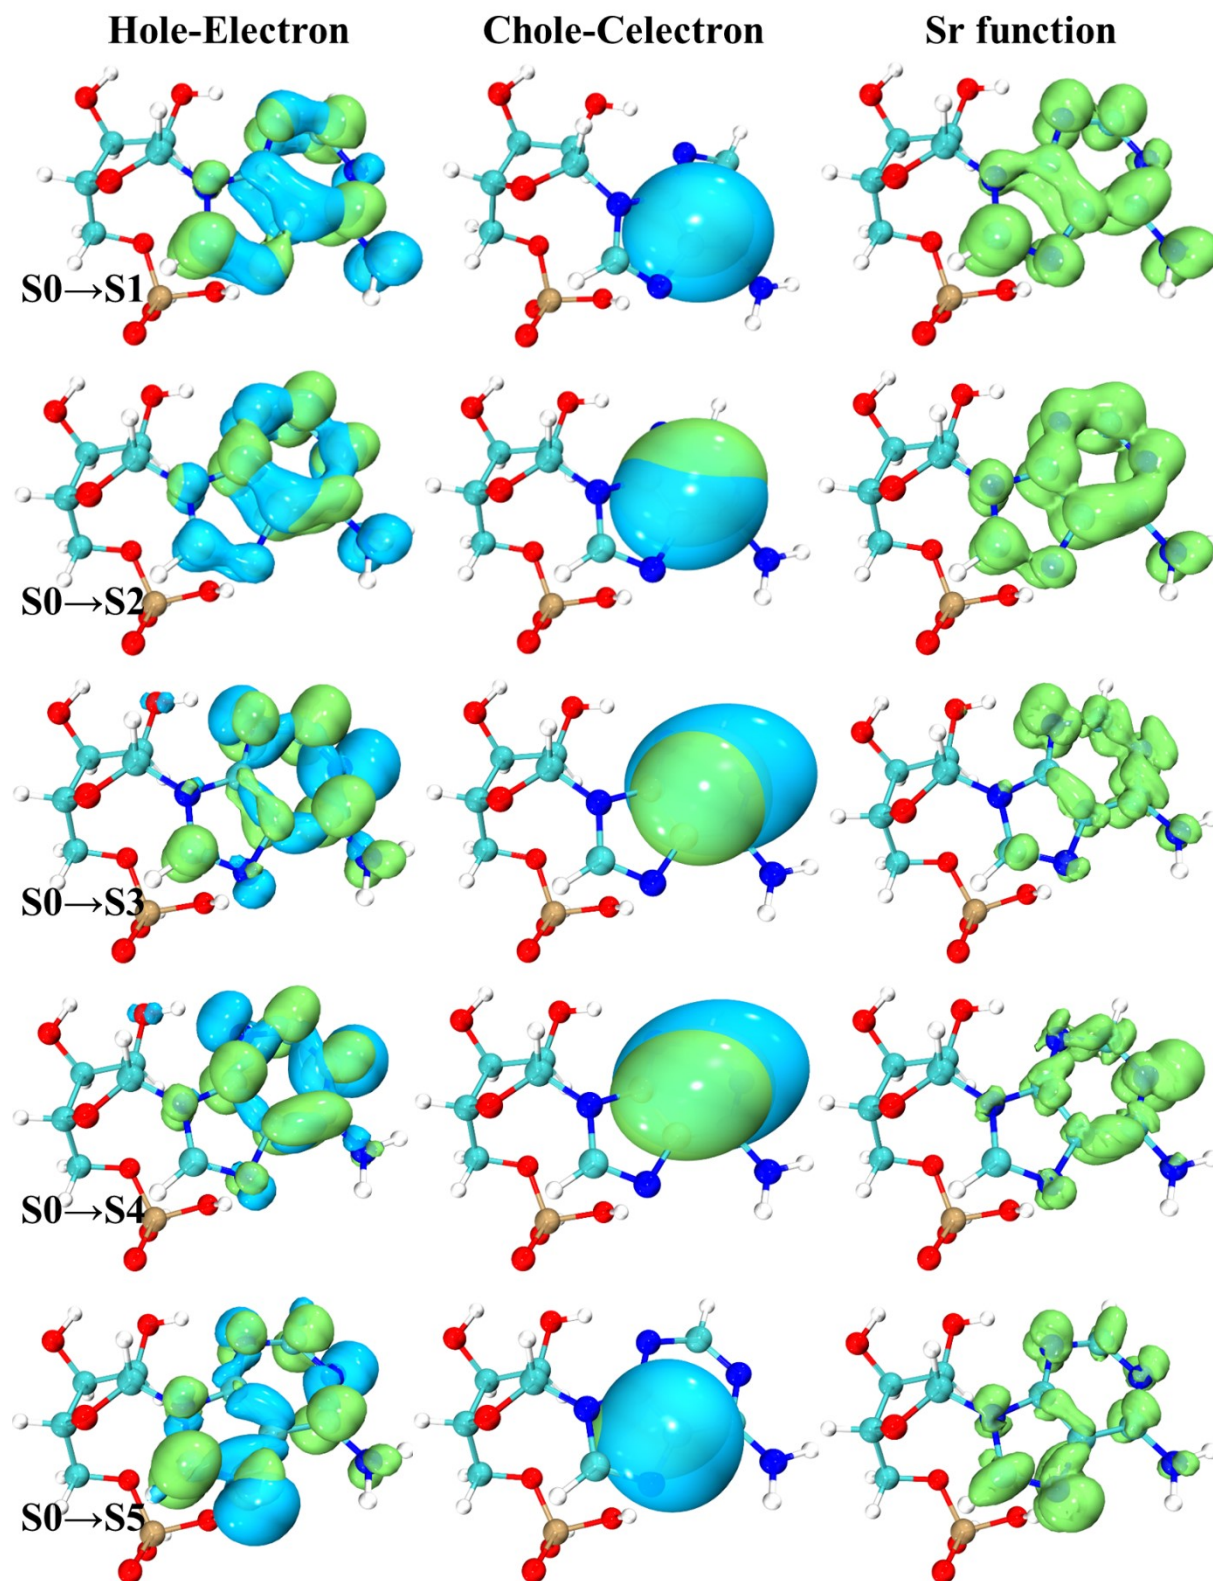

Figure S1. The illustration of hole-electron, Chole-Celectron, and Sr function of S1 to S5 of adenine. The isovalues of hole and electron are 0.003 au for hole-electron, while they are set to 0.002 au for Chole-Celectron and Sr function. Green and blue are denoted as electron and hole distributions, respectively.

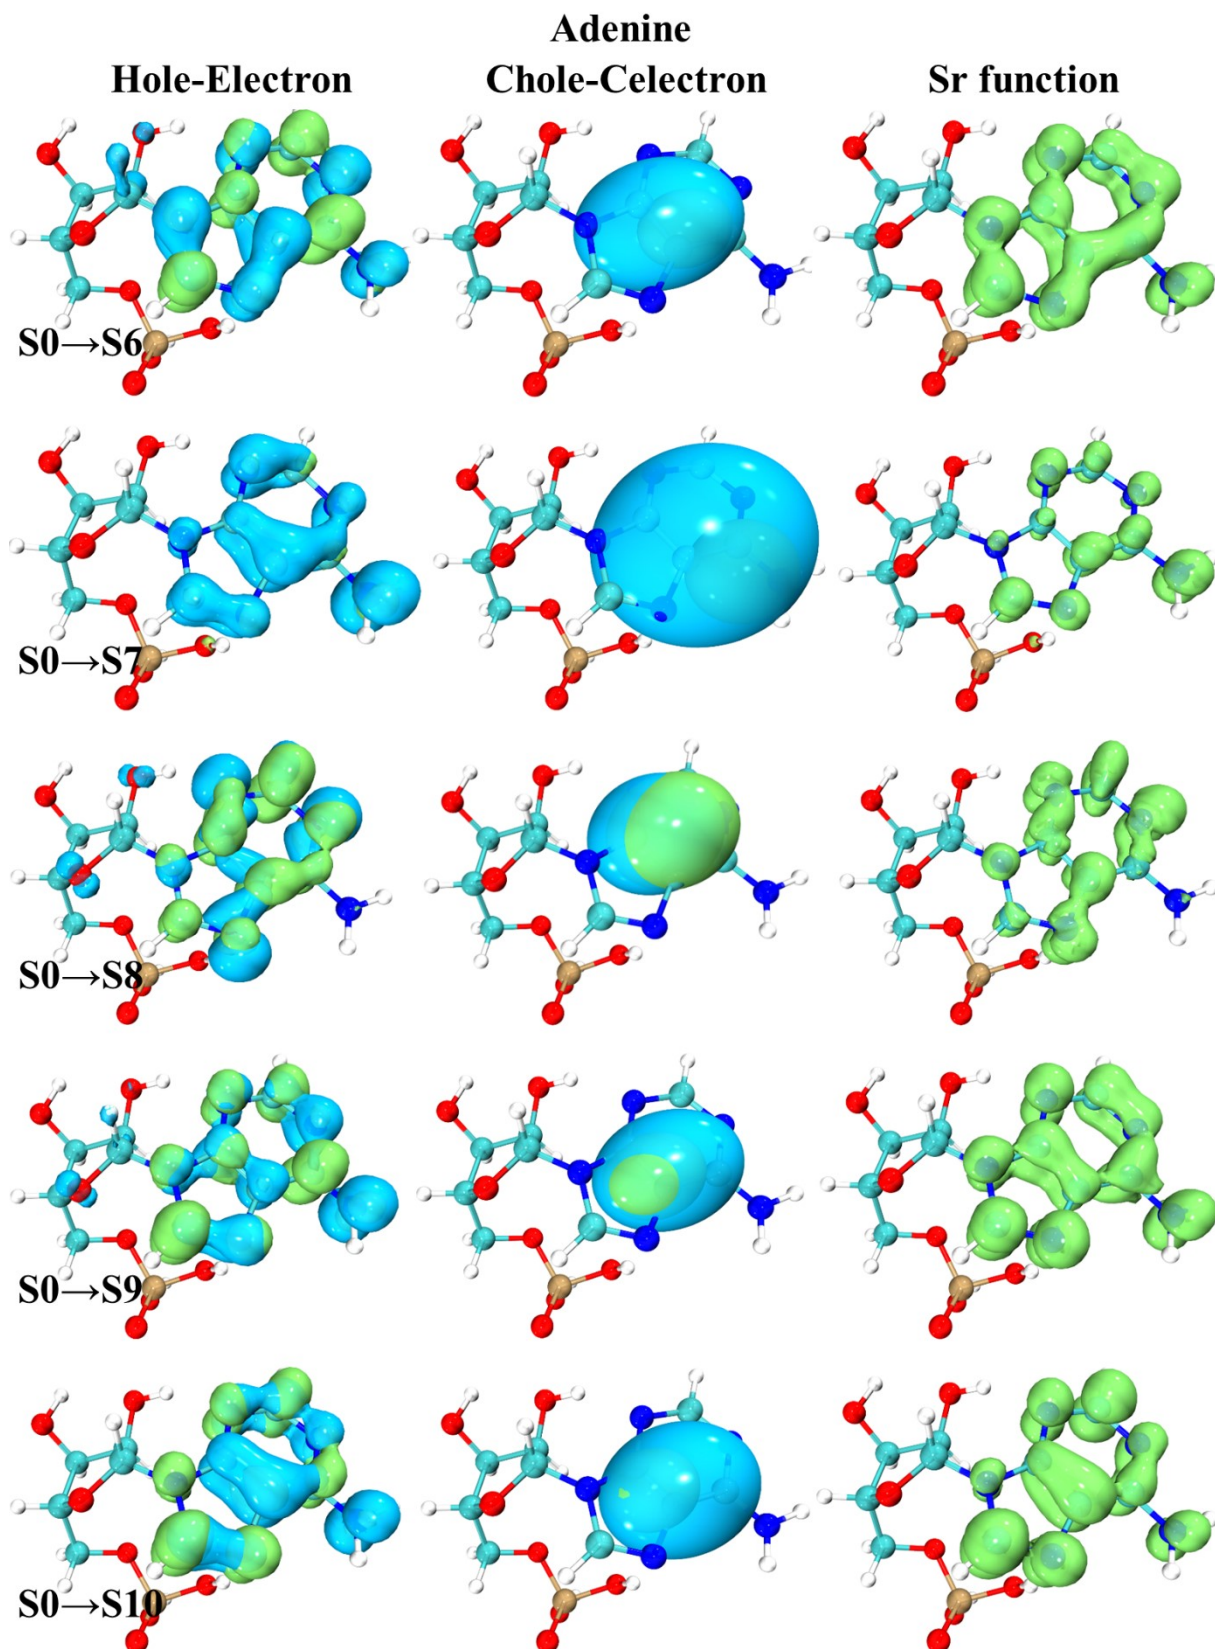

Figure S2. The illustration of hole-electron, Chole-Celextron, and Sr function of S6 to S10 of adenine. The isovalues of hole and electron are 0.003 au for hole-electron, while they are set to 0.002 au for Chole-Celextron and Sr function. Green and blue are denoted as electron and hole distributions, respectively.

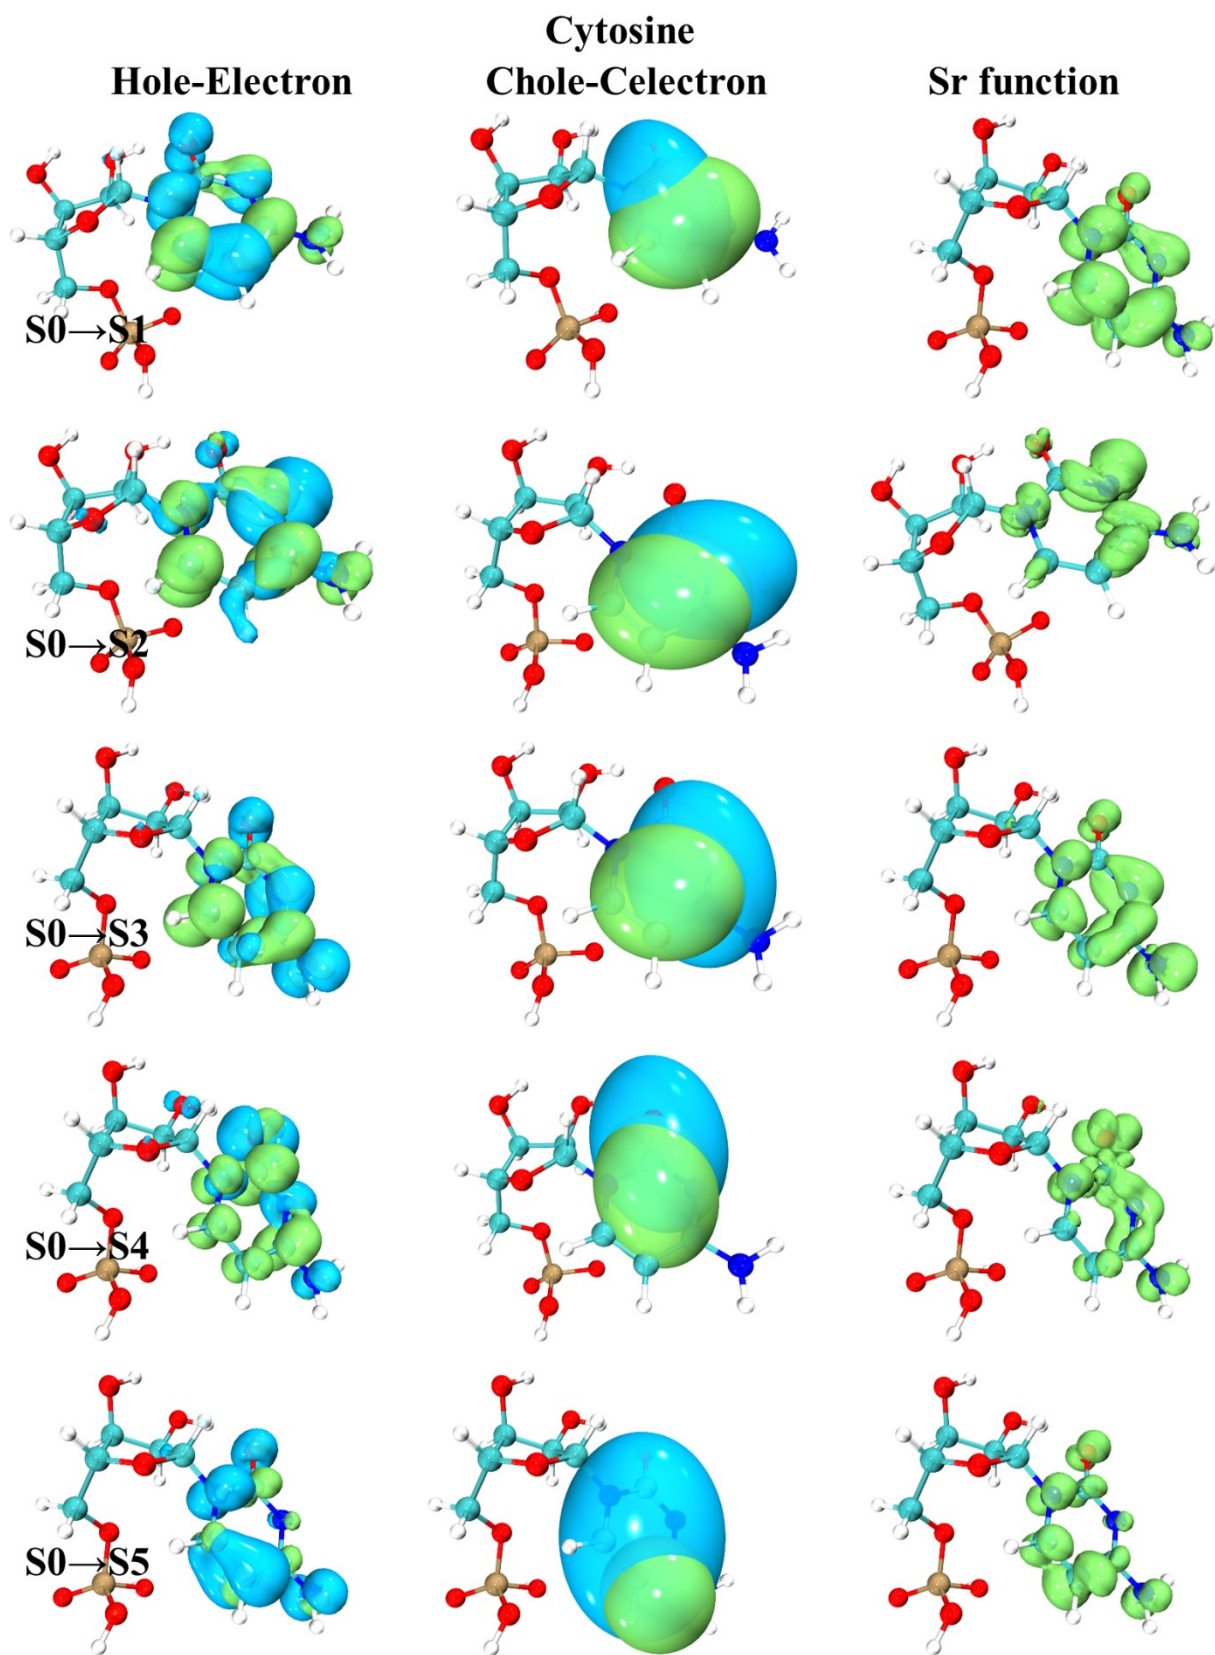

Figure S3. The illustration of hole-electron, Chole-Celectron, and Sr function of S1 to S5 of cytosine. The isovalues of hole and electron are 0.003 au for hole-electron, while they are set to 0.002 au for Chole-Celectron and Sr function. Green and blue are denoted as electron and hole distributions, respectively.

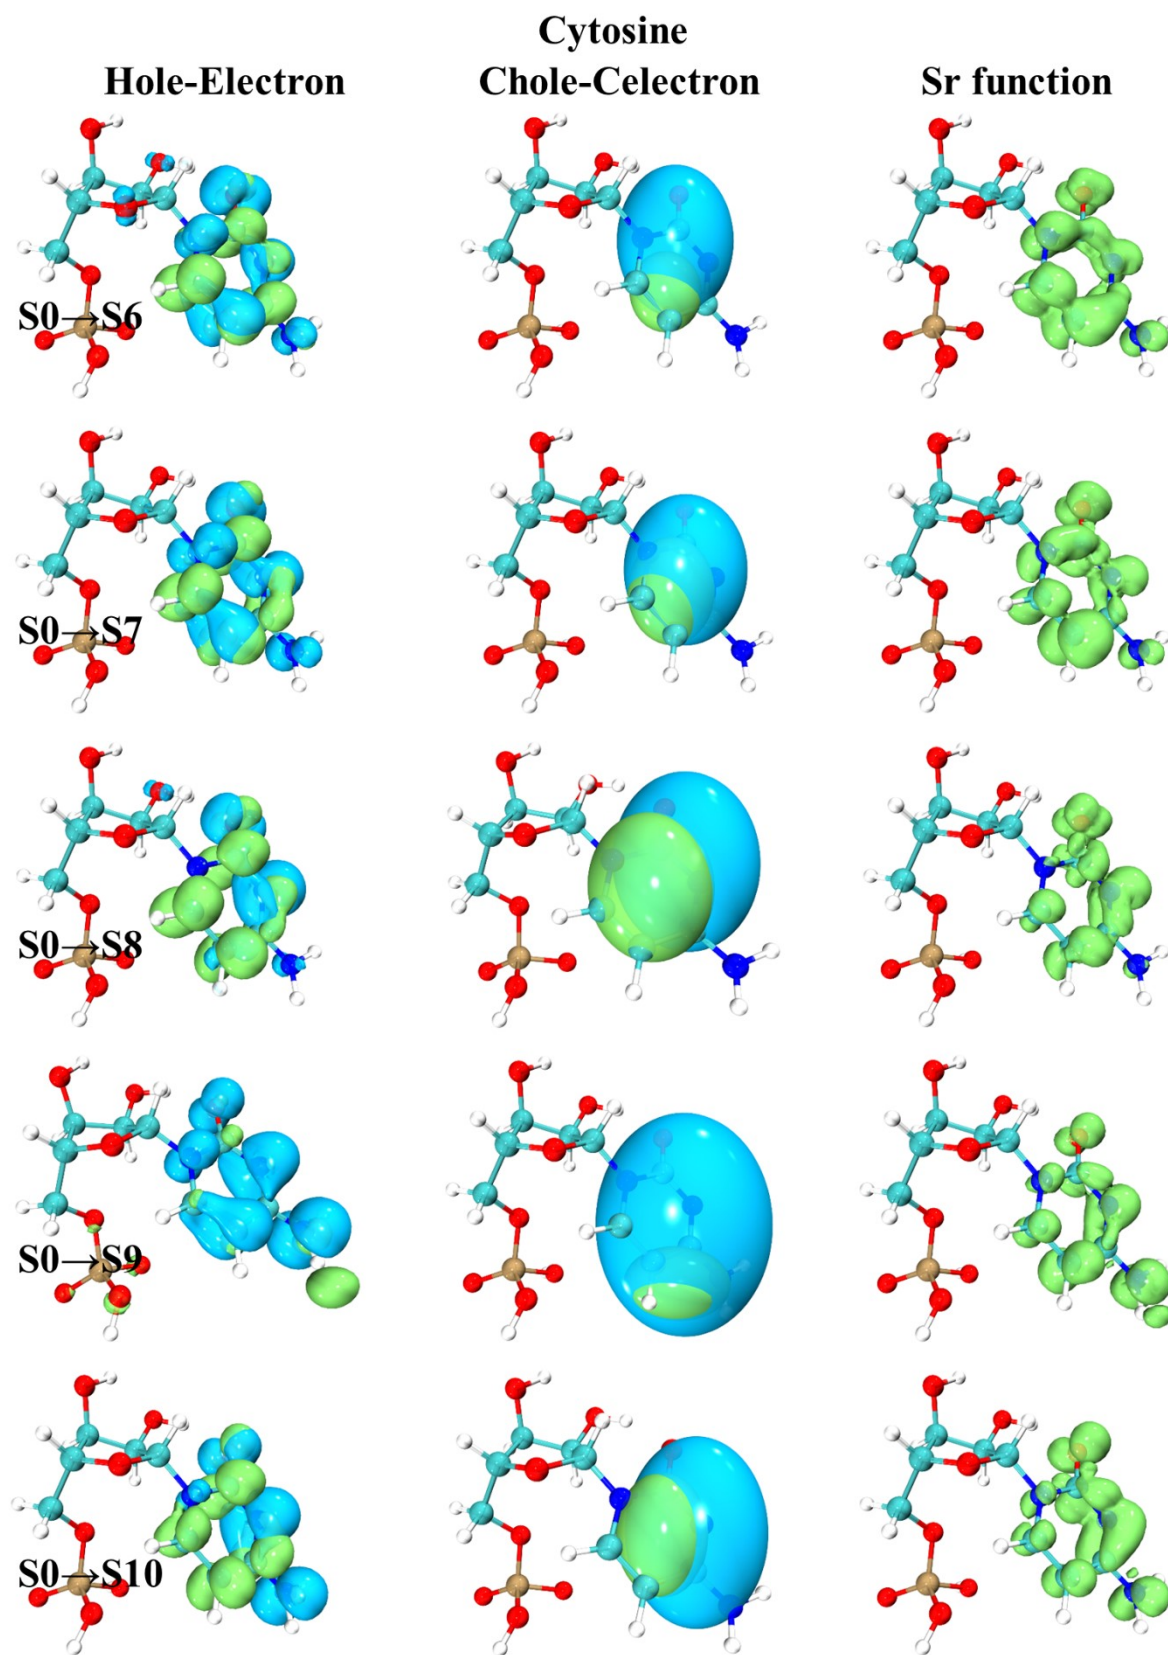

Figure S4. The illustration of hole-electron, Chole-Celextron, and Sr function of S6 to S10 of cytosine. The isovalues of hole and electron are 0.003 au for hole-electron, while they are set to 0.002 au for Chole-Celextron and Sr function. Green and blue are denoted as electron and hole distributions, respectively.

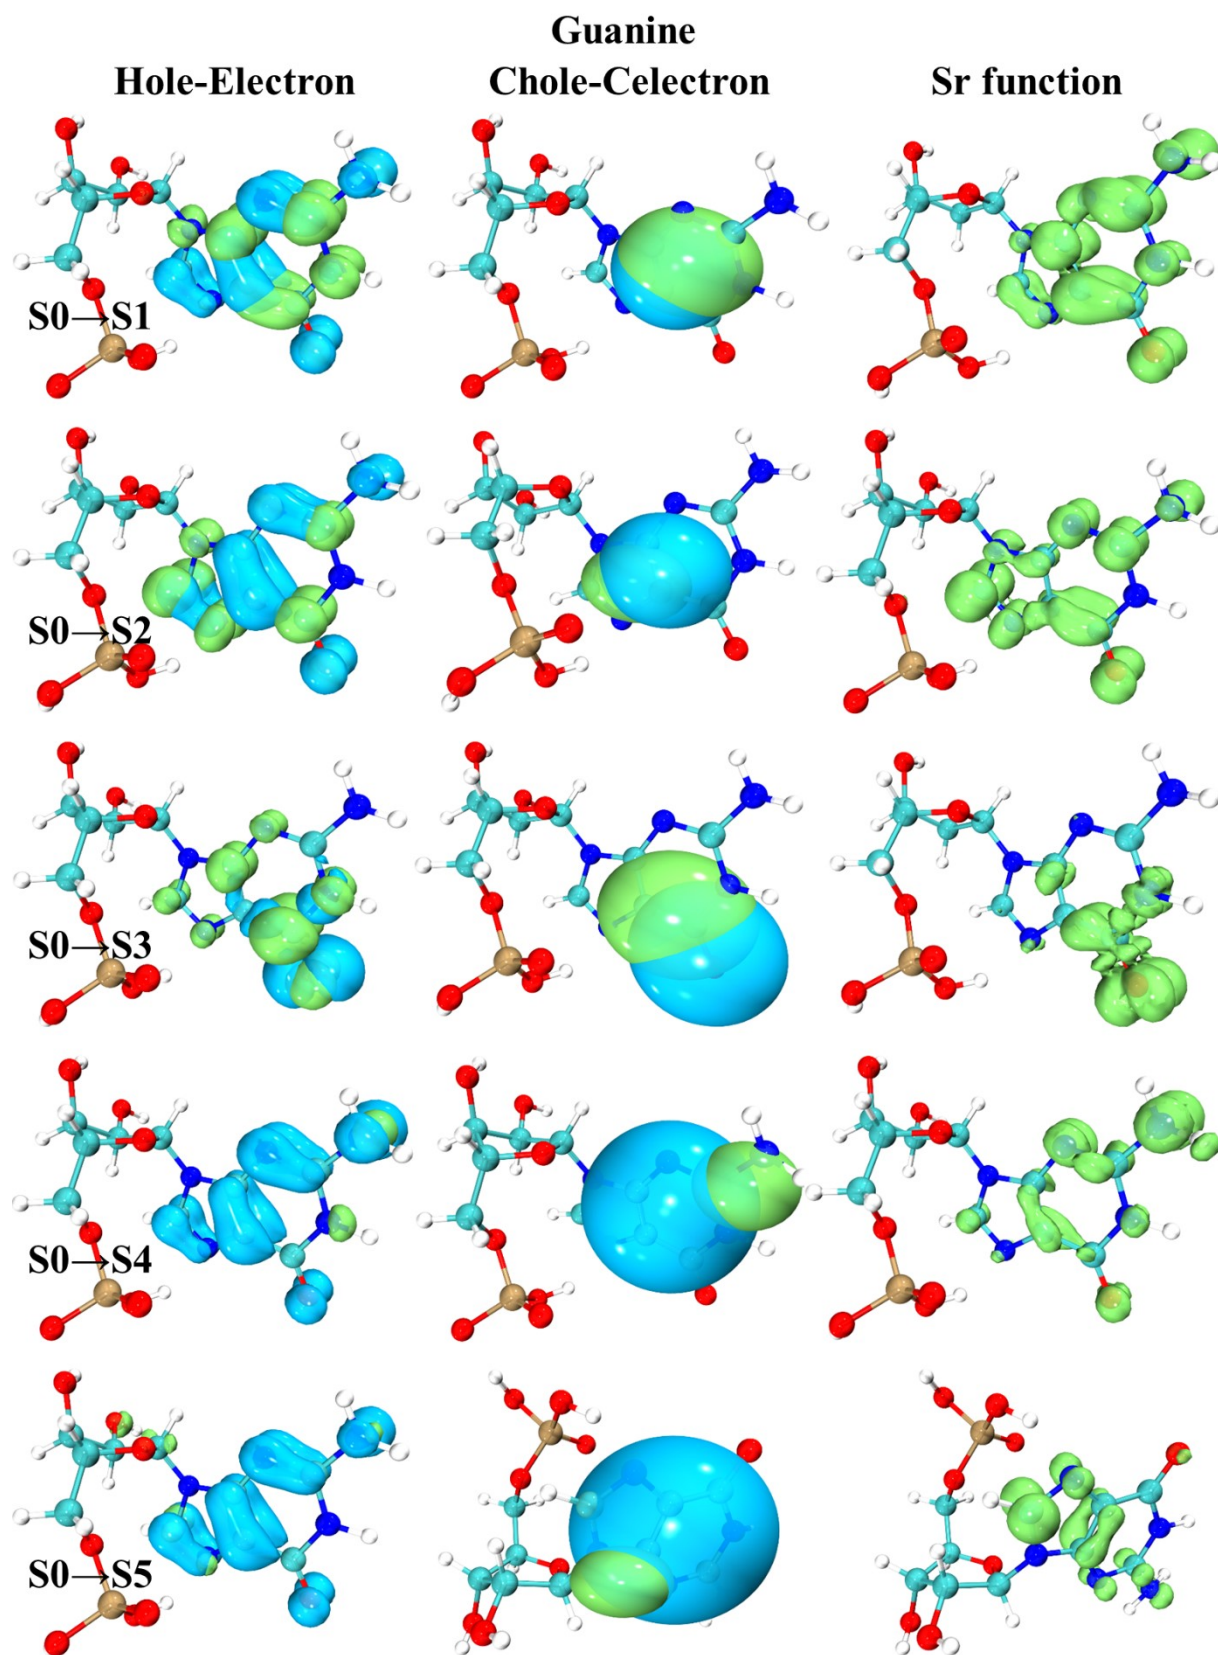

Figure S5. The illustration of hole-electron, Chole-Celectron, and Sr function of S1 to S5 of guanine. The isovalues of hole and electron are 0.003 au for hole-electron, while they are set to 0.002 au for Chole-Celectron and Sr function. Green and blue are denoted as electron and hole distributions, respectively.

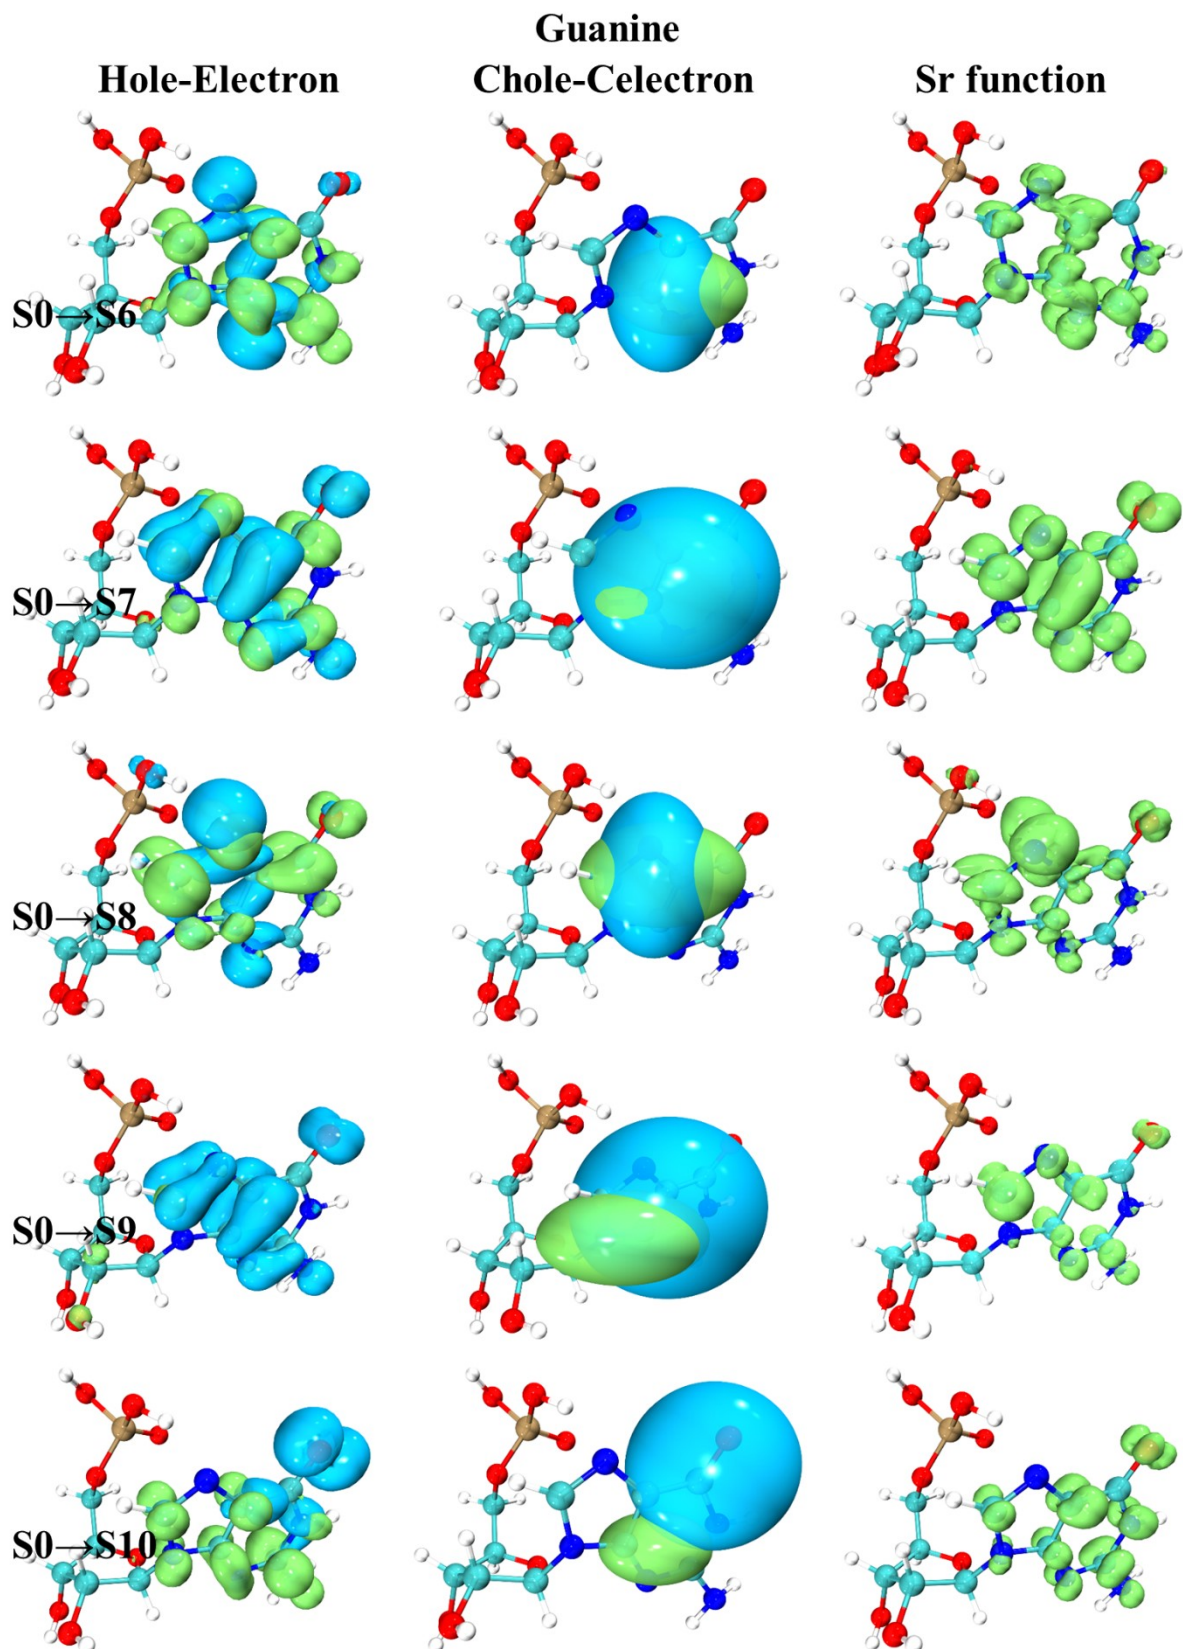

Figure S6. The illustration of hole-electron, Chole-Celectron, and Sr function of S6 to S10 of guanine. The isovalues of hole and electron are 0.003 au for hole-electron, while they are set to 0.002 au for Chole-Celectron and Sr function. Green and blue are denoted as electron and hole distributions, respectively.

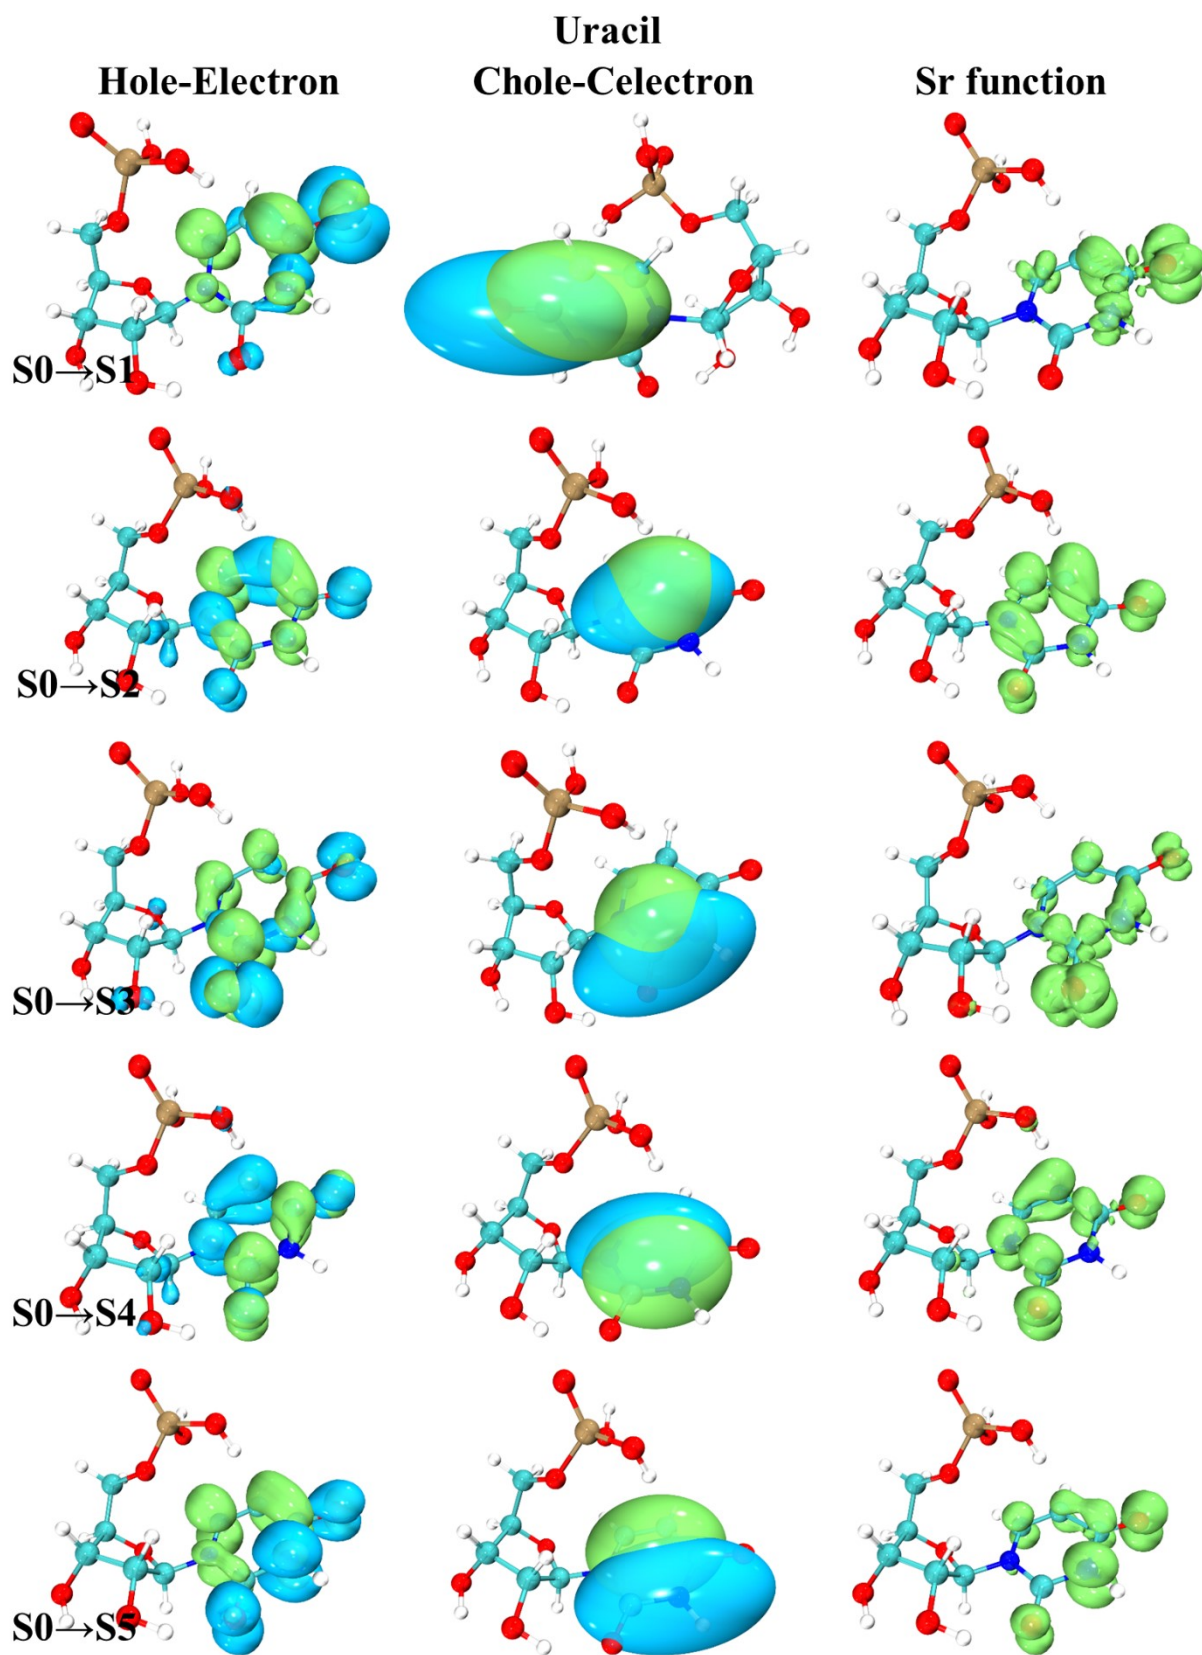

Figure S7. The illustration of hole-electron, Chole-Celectron, and Sr function of S1 to S5 of uracil. The isovalues of hole and electron are 0.003 au for hole-electron, while they are set to 0.002 au for Chole-Celectron and Sr function. Green and blue are denoted as electron and hole distributions, respectively.



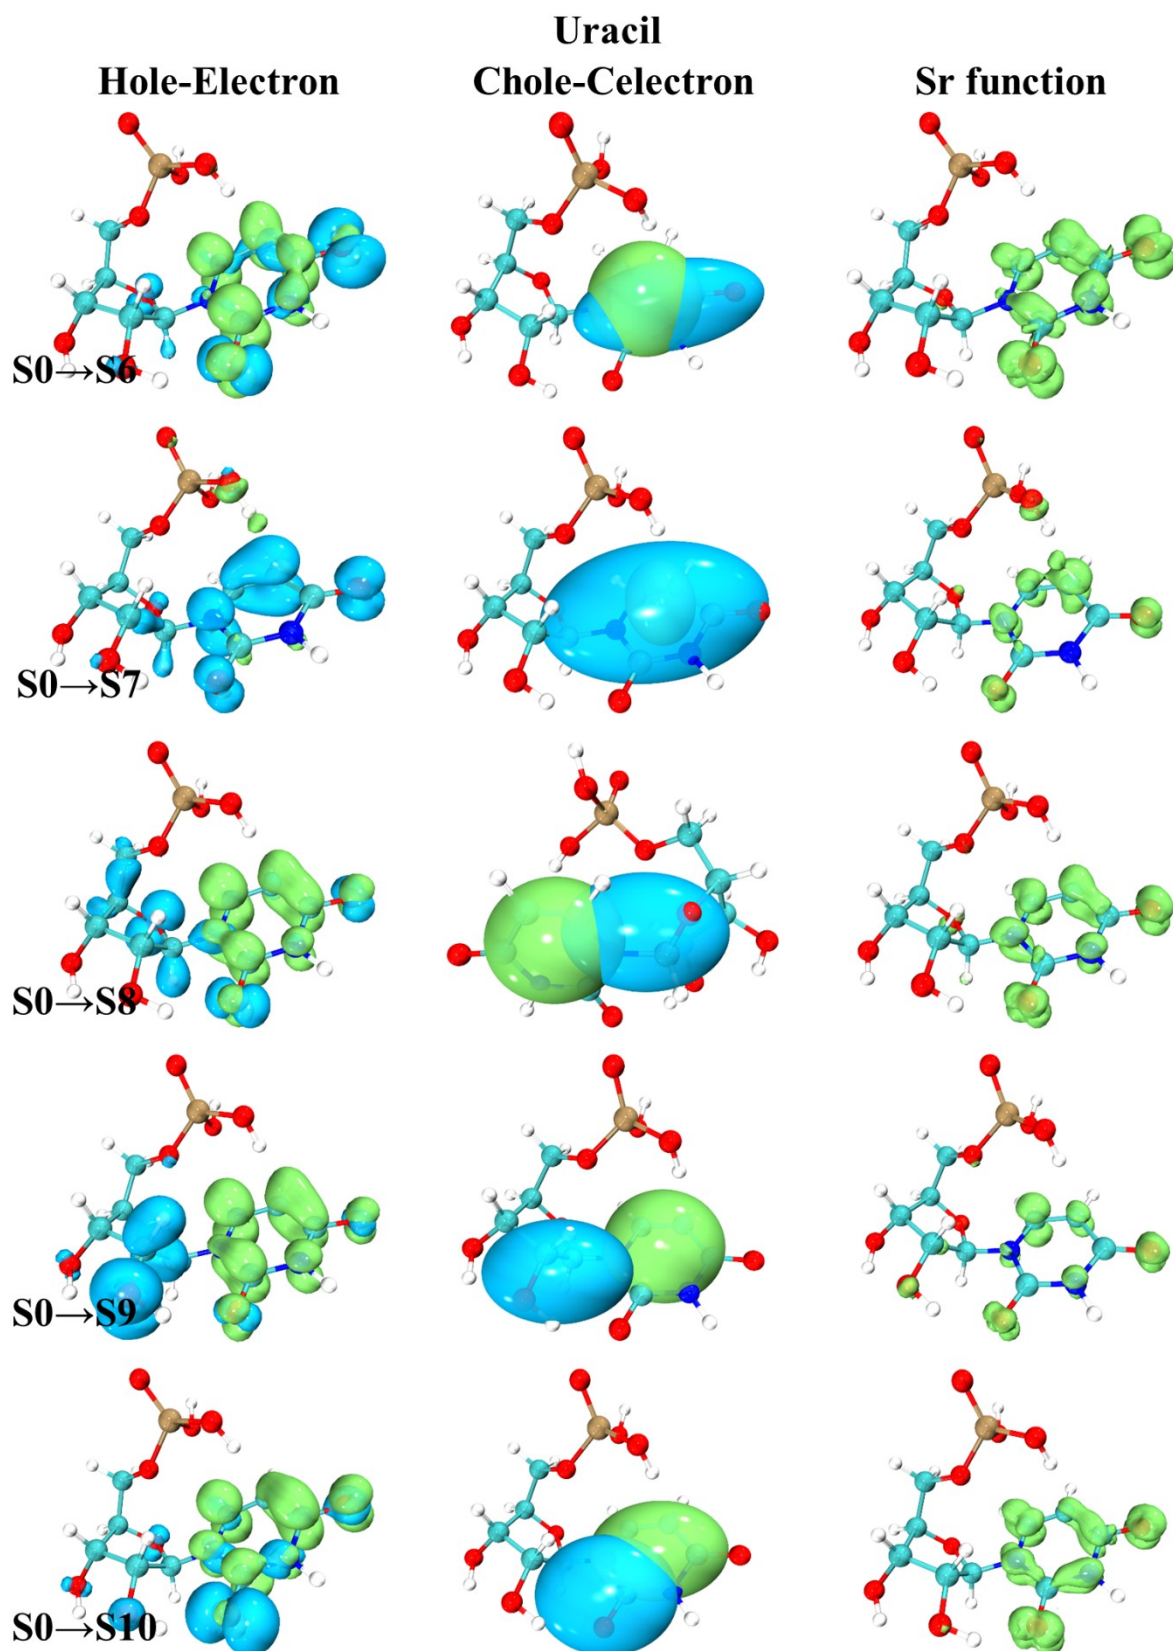

Figure S8. The illustration of hole-electron, Chole-Celectron, and Sr function of S6 to S10 of uracil. The isovalues of hole and electron are 0.003 au for hole-electron, while they are set to 0.002 au for Chole-Celectron and Sr function. Green and blue are denoted as electron and hole distributions, respectively.

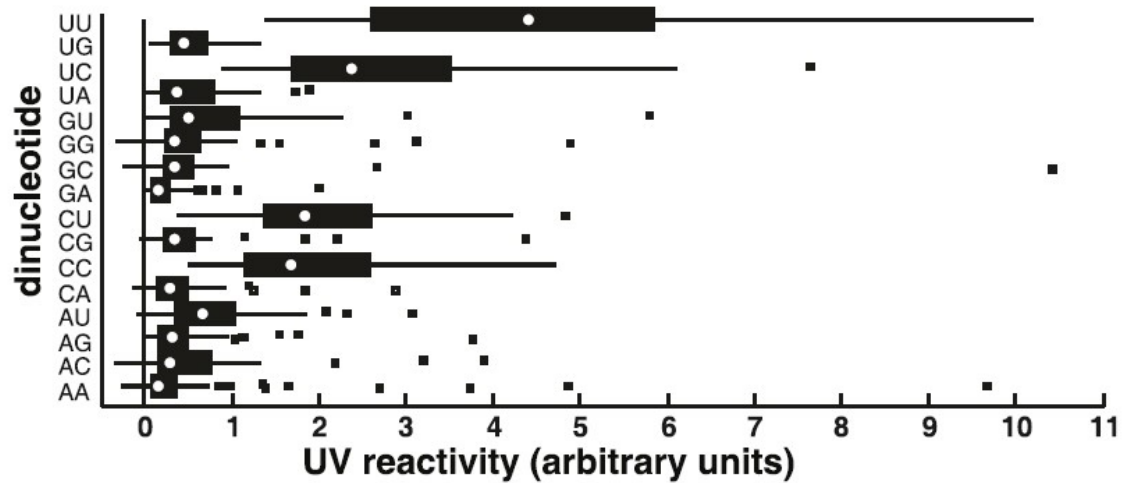

Figure S9. Box plot of reactivities across all dinucleotide types.<sup>1</sup>

### References

1. W. Kladwang, J. Hum and R. Das, *Scientific reports*, 2012, **2**, 1-7.
